# Supplementary material for: STE20/PAKA Protein Kinase Gene Releases an Autoinhibitory Domain through Pre-mRNA Alternative Splicing in the Dermatophyte Trichophyton rubrum
Source: PubMed Central journal article supplement (PMC6274995; doi:10.3390/ijms19113654), 2018-11-20
Supplement: ijms-19-03654-s001.pdf [file ijms-19-03654-s001.pdf]

Activation of STE20/PAKA protein kinase in the dermatophyte *Trichophyton rubrum* through alternative splicing

Supplementary Material

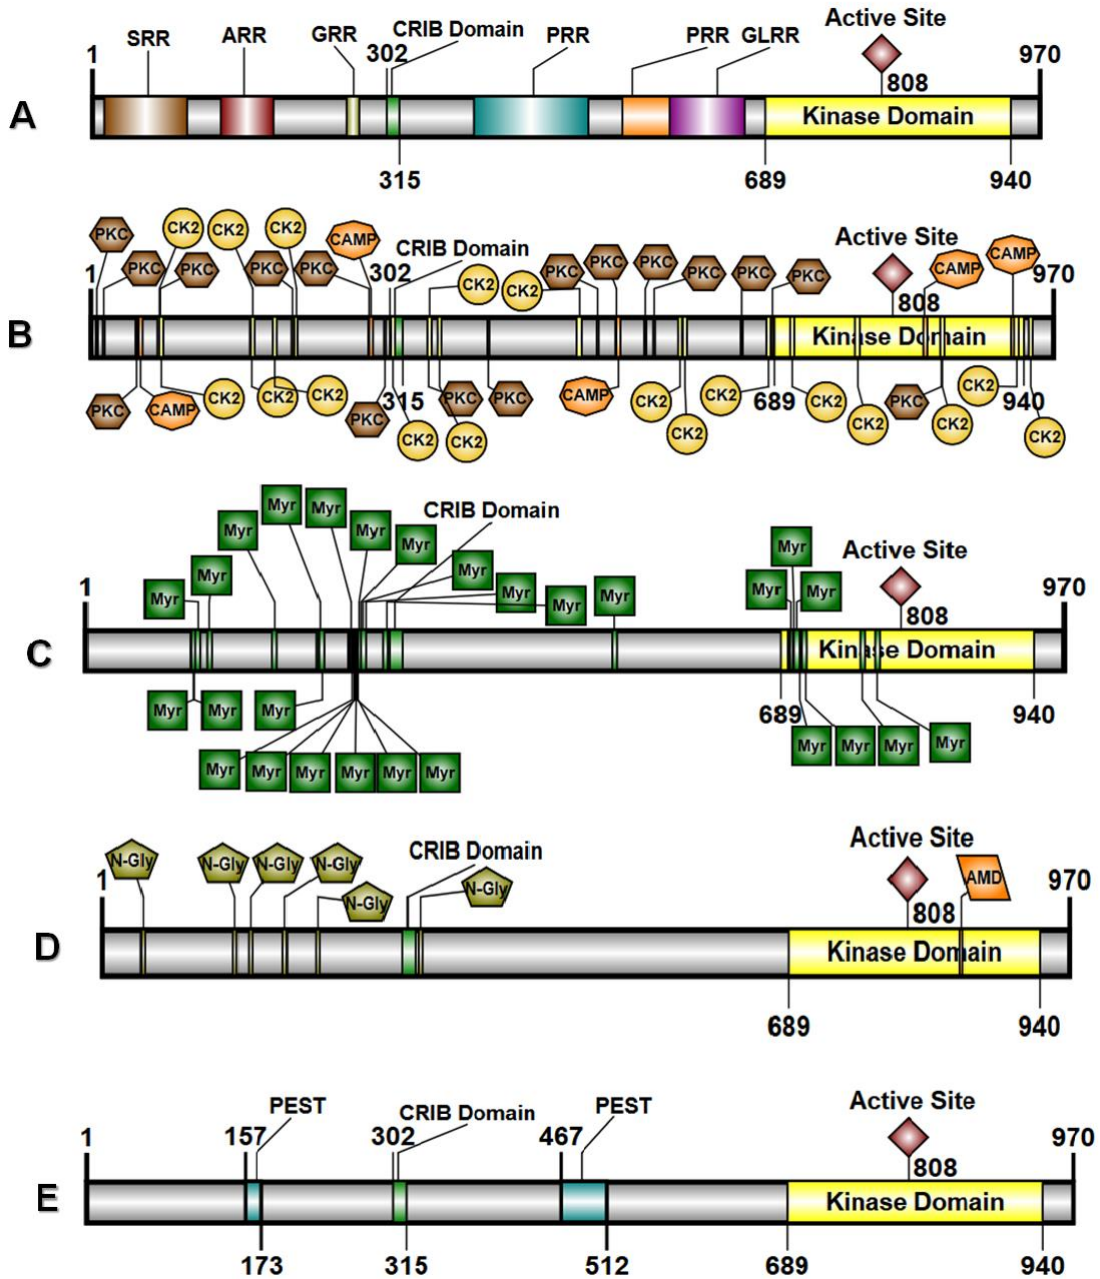

**Figure S1:** Graphical representation of functional STE20/PAKA protein. **A** - Specific amino acids rich regions; **B** - Phosphorylation sites; **C** - N-myristoylation sites; **D** - N-Glycosylation and amidation sites. **E** - PEST motifs sites; **Legends:** **SSR:** Serine-rich region; **ARR:** Asparagine-rich region; **GRR:** Glycine-rich region; **PRR:** Proline-rich region; **GLRR:** Glutamine-rich region; **PKC:** Protein kinase C; **CAMP:** cAMP/cGMP-dependent protein kinase; **CK2:** Casein kinase; **Myr:** N-myristoylation; **N-Gly:** N-Glycosylation; **AMD:** Amidation.

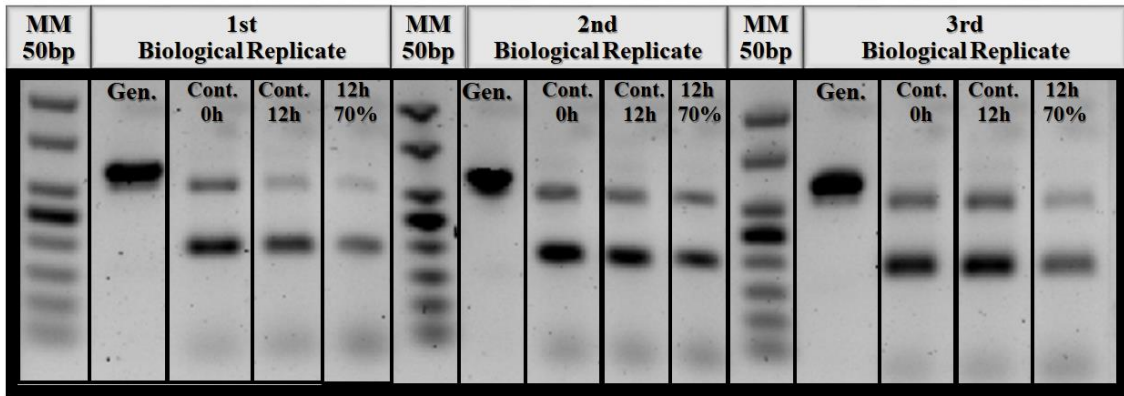

**Figure S2:** Agarose gel electrophoresis (1.5%) run with PCR products from three biological replicates for validation of the *pakA/Ste20* intron-1 retention. **Legends:** **Gen.:** Amplification from genomic DNA (gene amplification positive control); **Cont.:** Control condition, culture without the presence of the UDA; **0h:** Amplification product from cDNA coming from the culture in medium without the presence of the drug; **70%:** Amplification product from cDNA coming from culture medium containing 70% of the UDA MIC; **MM:** Molecular weight marker (50bp).

**Table S1:** Primers used for qRT-PCR.

| Primer       | Sequence (5'-3')     | Tm | %GC | Lenght (nt) |
|--------------|----------------------|----|-----|-------------|
| pakA-F       | GCAACTTCGTCAACAGCA   | 58 | 50  | 18          |
| pakA-R       | CAACCATTGTCTGCGGAT   | 60 | 50  | 18          |
| i-qRT-pakA.F | CACCACCTTTCTTTCTCC   | 57 | 50  | 18          |
| i-qRT-pakA.R | CAGGATAGTGAAGCAGAC   | 56 | 50  | 18          |
| e-qRT-pakA.F | CCAGAACTACCCTCTACAAC | 59 | 50  | 20          |
| e-qRT-pakA.R | GGAGGTAGTGGCATTGT    | 59 | 50  | 18          |
